# Supplementary material
Source: Springer Nature journal article supplement (https://www.springermedizin.de/resource/supplementary/12985_2008_484_MOESM2_ESM.pdf/9607852)

(A) Plant biomass

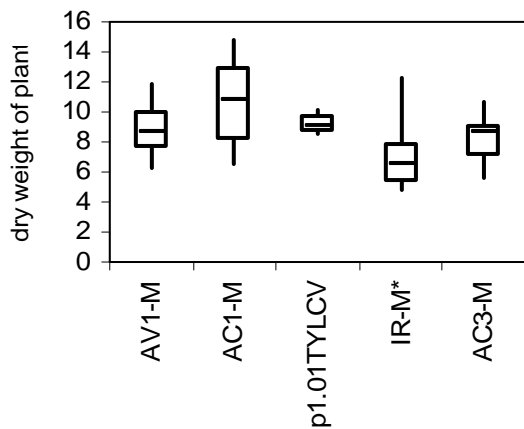

(B) 15 days post inoculation

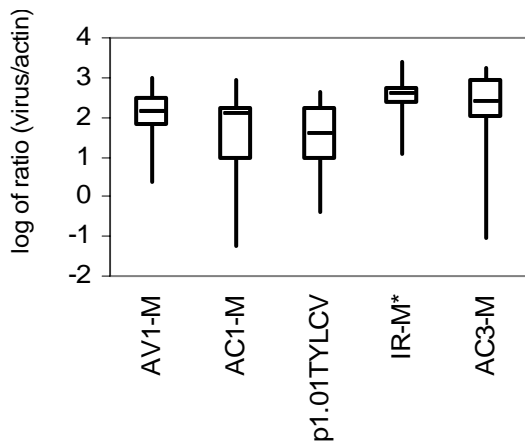

(C) 25 days post inoculation

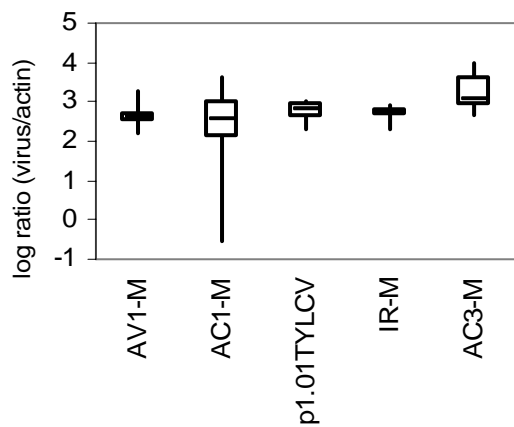

(D) 35 days post inoculation

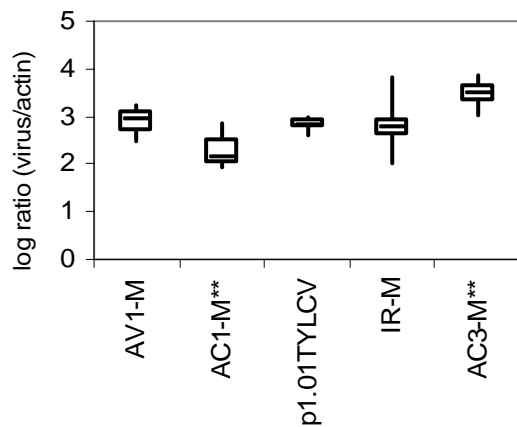

Supplement: MOESM2 [file 9607852]
